# Supplementary material
Source: HighWire-hosted journal article supplement (https://www.life-science-alliance.org/content/6/5/e202201702/F8)

Figure 3B

## Body weight change

|           |   | Days after DSS |           |           |           |           |
|-----------|---|----------------|-----------|-----------|-----------|-----------|
|           | 0 | 1              | 1         | 1         | 1         | 1         |
| DSS       | 1 | 0.9357798      | 1.12844   | 1.19171   | 0.9570816 | 1.030769  |
|           | 2 | 1.089109       | 0.8947368 | 1.057692  | 0.962963  | 1         |
|           | 3 | 0.963366       | 1.02037   | 0.9315069 | 1.022222  | 0.9708334 |
|           | 4 | 0.957346       | 0.939896  | 0.972165  | 0.904854  | 0.949724  |
|           | 5 | 0.9018584      | 0.935135  | 0.9647577 | 0.95      | 0.909005  |
|           | 6 | 0.87175        | 0.9136364 | 0.8025424 | 0.8404255 | 0.860606  |
|           | 7 | 0.849495       | 0.8023923 | 0.815075  | 0.801511  | 0.817033  |
|           | 0 | 1              | 1         | 1         | 1         | 1         |
| GA10+DSS  | 1 | 0.930131       | 1.1       | 0.9856459 | 0.932     | 1.111111  |
|           | 2 | 1.173267       | 1.089109  | 0.9761062 | 1.027149  | 0.9208333 |
|           | 3 | 0.950485       | 0.9614718 | 0.997541  | 0.9711934 | 0.9416667 |
|           | 4 | 0.9701493      | 0.939409  | 0.9481132 | 0.9454545 | 1.018957  |
|           | 5 | 0.9375708      | 0.9717352 | 0.904292  | 0.9255102 | 0.9466135 |
|           | 6 | 0.869204       | 0.8107143 | 0.8529412 | 0.902449  | 0.882266  |
|           | 7 | 0.830928       | 0.8065854 | 0.852941  | 0.8855072 | 0.921175  |
|           | 0 | 1              | 1         | 1         | 1         | 1         |
| GA50+DSS  | 1 | 1.122066       | 1.007905  | 1.150485  | 0.9184549 | 0.926087  |
|           | 2 | 0.9662447      | 1.090909  | 1.025253  | 0.9942731 | 1.03198   |
|           | 3 | 0.959072       | 0.960302  | 1.003927  | 0.9959322 | 0.9666372 |
|           | 4 | 0.960256       | 0.969479  | 0.989204  | 0.9501923 | 0.920934  |
|           | 5 | 0.9558883      | 0.9506977 | 0.9418803 | 0.9861789 | 0.909787  |
|           | 6 | 0.9427039      | 0.946275  | 0.948374  | 0.920354  | 0.914276  |
|           | 7 | 0.931679       | 0.927436  | 0.901574  | 0.885892  | 0.831691  |
|           | 0 | 1              | 1         | 1         | 1         | 1         |
| GA250+DSS | 1 | 1.037657       | 0.9992157 | 0.9818566 | 1         | 1.084507  |
|           | 2 | 0.9975983      | 0.9291667 | 0.952709  | 1         | 1.026906  |
|           | 3 | 0.9326693      | 0.923223  | 0.9828326 | 0.976     | 0.9843568 |
|           | 4 | 0.971066       | 0.9342723 | 0.9055794 | 0.924     | 0.9596681 |
|           | 5 | 0.9290323      | 0.933613  | 0.919797  | 0.968807  | 0.9140496 |
|           | 6 | 0.876923       | 0.8545454 | 0.9011111 | 0.914423  | 0.8875    |
|           | 7 | 0.821564       | 0.8042268 | 0.8264706 | 0.8911917 | 0.891362  |

Figure 3C

## Colon length (cm)

| DSS day3  |     |     |     |     |     |
|-----------|-----|-----|-----|-----|-----|
| Mouse NO. | 1   | 2   | 3   | 4   | 5   |
| GA0       | 7.7 | 7.6 | 6.9 | 7.6 | 7.4 |
| GA10      | 7.5 | 7.5 | 7.1 | 7.8 | 8.2 |
| GA50      | 8   | 8.2 | 7.9 | 8.5 | 8.6 |
| GA250     | 7.2 | 8.4 | 8.2 | 7.7 | 8.3 |

  

| DSS day7  |     |     |     |     |     |
|-----------|-----|-----|-----|-----|-----|
| Mouse NO. | 1   | 2   | 3   | 4   | 5   |
| GA0       | 5.9 | 5.7 | 5.5 | 4.9 | 4.5 |
| GA10      | 4.5 | 6   | 4.3 | 5.3 | 5.5 |
| GA50      | 6.1 | 6.1 | 6.3 | 5.8 | 5.7 |
| GA250     | 4   | 4.2 | 5   | 5.1 | 4.2 |

Figure 3D

## Histological score

| DSS day3  |   |   |   |   |   |
|-----------|---|---|---|---|---|
| Mouse NO. | 1 | 2 | 3 | 4 | 5 |
| GA0       | 0 | 1 | 0 | 0 | 0 |
| GA10      | 0 | 0 | 1 | 0 | 0 |
| GA50      | 0 | 0 | 1 | 0 | 0 |
| GA250     | 3 | 2 | 2 | 3 | 2 |

  

| DSS day7  |   |   |   |   |   |
|-----------|---|---|---|---|---|
| Mouse NO. | 1 | 2 | 3 | 4 | 5 |
| GA0       | 6 | 6 | 6 | 5 | 6 |
| GA10      | 6 | 5 | 4 | 4 | 4 |
| GA50      | 3 | 2 | 2 | 2 | 1 |
| GA250     | 6 | 6 | 6 | 5 | 6 |

Figure 3E

|               |          | Fold of change<br>relative to GAPDH |          |          |          |          |
|---------------|----------|-------------------------------------|----------|----------|----------|----------|
| IL-6          | DSS      | 0.959264                            | 0.835088 | 1.06437  | 0.965936 | 1.117287 |
|               | GA50+DSS | 0.48971                             | 1.035265 | 0.535887 | 0.550953 | 0.697372 |
| CCx12         | DSS      | 1.145518                            | 0.516199 | 0.572759 | 2.243887 | 1.315855 |
|               | GA50+DSS | 0.122089                            | 0.081109 | 0.141218 | 0.092526 | 0.082813 |
| CCx11         | DSS      | 1.129747                            | 0.761017 | 1.271032 | 0.761017 | 0.976709 |
|               | GA50+DSS | 0.719966                            | 0.690637 | 0.898755 | 0.635516 | 0.322194 |
| IL-1 $\beta$  | DSS      | 1.486583                            | 1.207481 | 1.549712 | 0.441964 | 0.813379 |
|               | GA50+DSS | 1.008352                            | 0.2469   | 0.188417 | 0.463937 | 0.295658 |
| TNF- $\alpha$ | DSS      | 1.125058                            | 0.729005 | 1.251796 | 0.729005 | 1.167967 |
|               | GA50+DSS | 0.210808                            | 0.860949 | 0.508387 | 0.89131  | 0.448755 |

Figure 3F p-p65

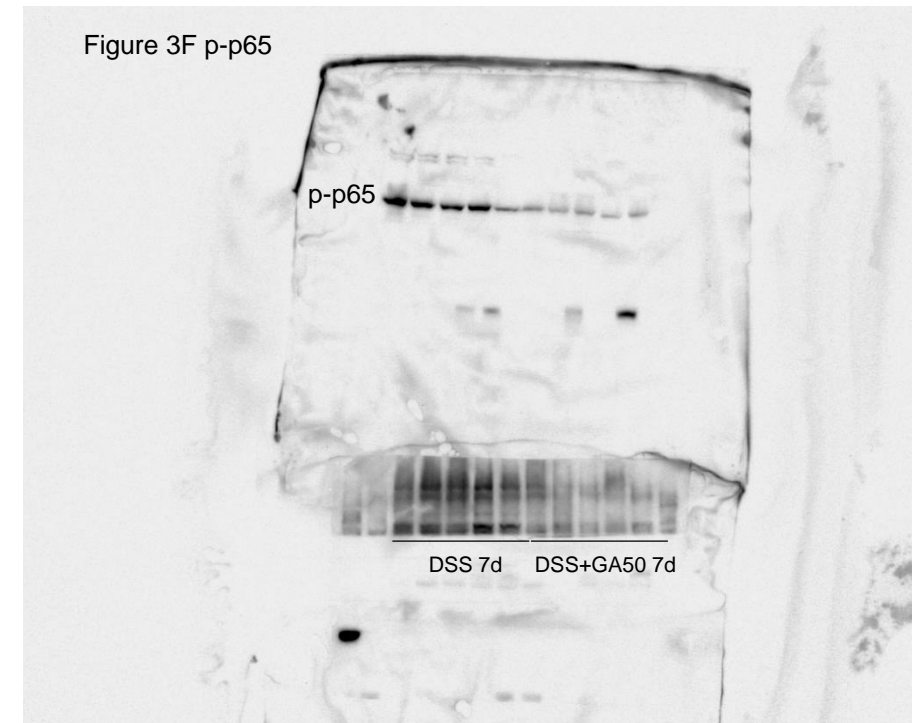

Figure 3F p-ERK

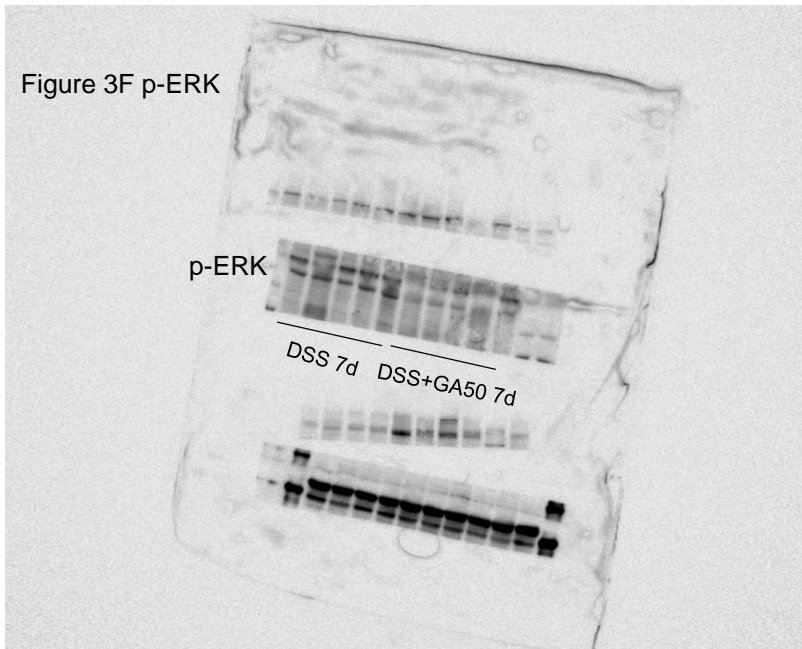

Figure 3F GAPDH

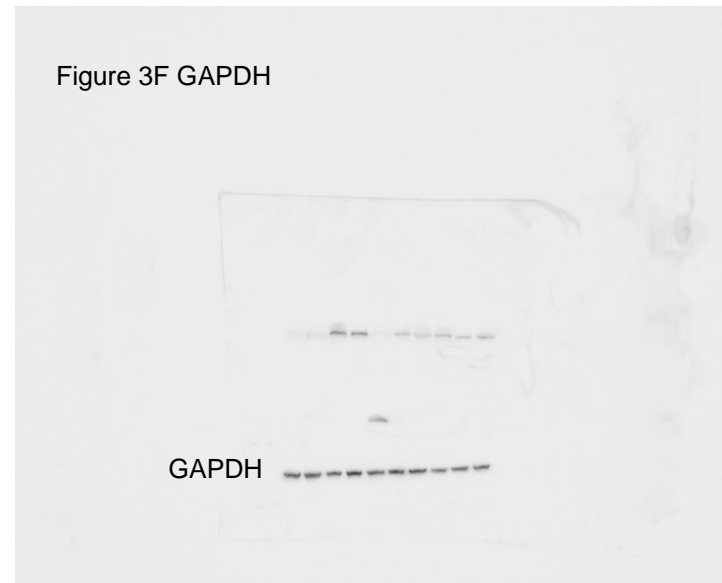

Figure 3F p-stat3

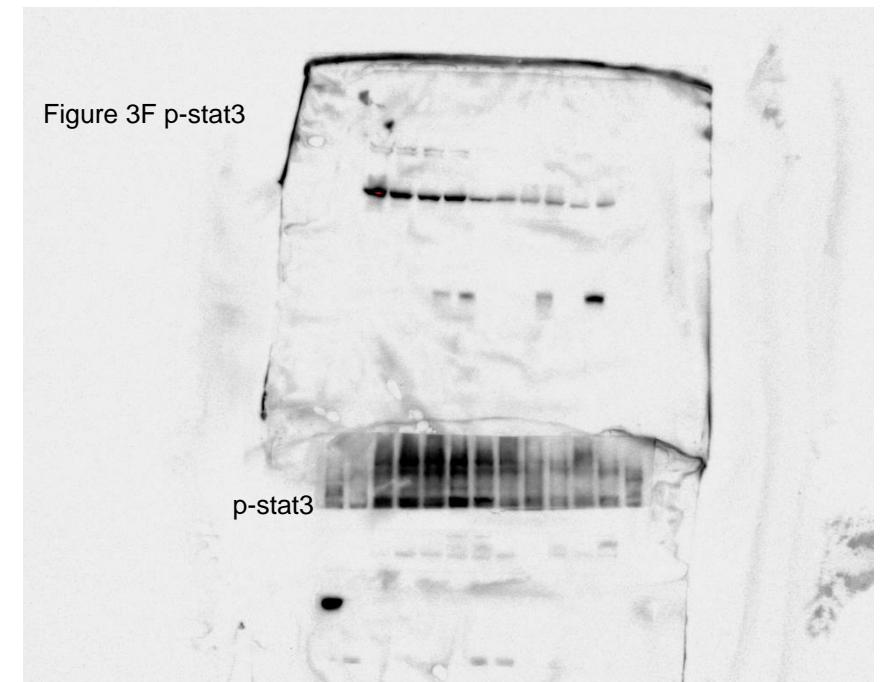

Figure 3G  
GAPDH

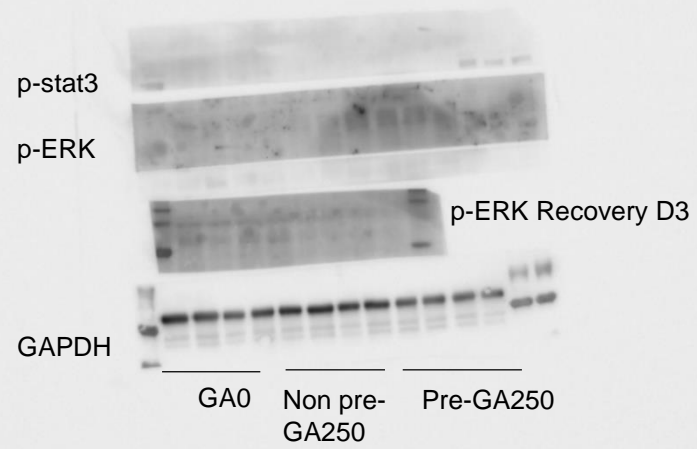

Figure 3G  
pERK

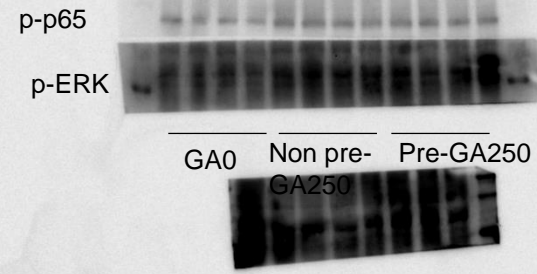

Figure 3G  
p-p65

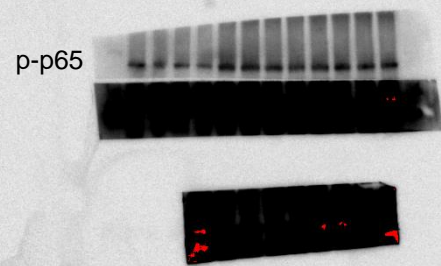

Figure 3G  
p-stat3

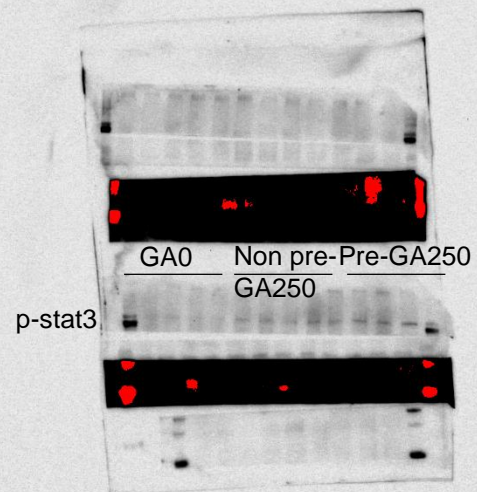

Supplement: inline-supplementary-material-4 [file inline-supplementary-material-4.pdf]
